# Supplementary material for: Homology modeling of dihydrofolate reductase from T. gondii bonded to antagonists: molecular docking and molecular dynamics simulations
Source: Royal Society of Chemistry journal article supplement (doi:10.1039/c3mb25530a), 2013-02-08

Simulation behaviour of *Tgondii*DHFR complex to pyrimethamine and NADP along time. (A) Root main square deviation. (B) Radius of gyration.

The blue lines refer to native *Tgondii*DHFR and black lines refer to double mutant Ser35Arg and Thr82Asn.

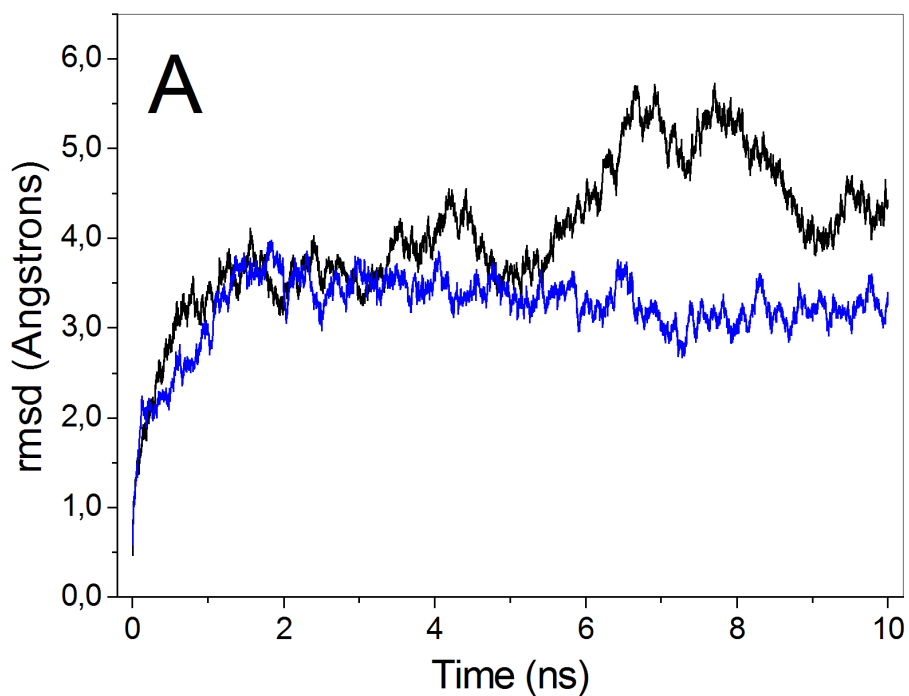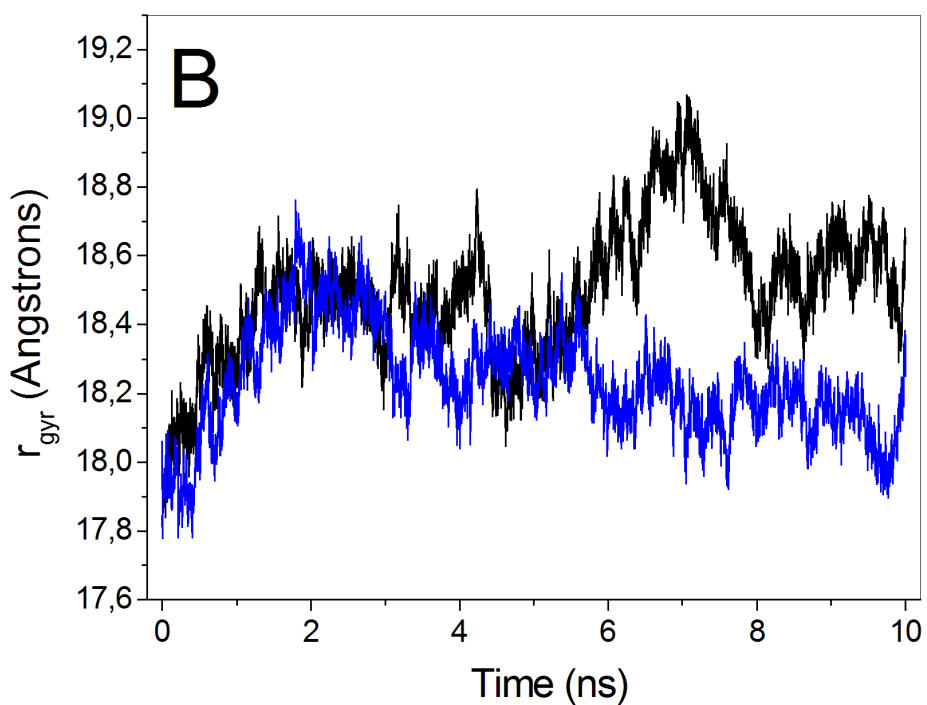

Supplement: c3mb25530a.pdf [file c3mb25530a.pdf]
