# Supplementary material for: Homology modeling of dihydrofolate reductase from T. gondii bonded to antagonists: molecular docking and molecular dynamics simulations
Source: Royal Society of Chemistry journal article supplement (doi:10.1039/c3mb25530a), 2013-02-08
Supplement: c3mb25530a_2.pdf [file c3mb25530a_2.pdf]

File Name : Figure-ESI.tiff

Caption : Ribbon diagram of TgondiiDHFR model bonded to CP6 and NADP (A).  
Topology diagram for TgondiiDHFR (B) and templates PfalcipDHFR (C) and  
TbruceiDHFR (D).
